# Supplementary material for: Interfacial adsorption study of Nitrogen based inhibitors in silane nanocontainers as anticorrosive and self-healing material for steel in strong acid solution.
Source: Royal Society of Chemistry journal article supplement (doi:10.1039/d3ta02203j), 2023-01-01
Supplement: d3ta02203j1.pdf [file d3ta02203j1.pdf]

ARTICLE

**Interfacial adsorption study of Nitrogen based inhibitors in silane nanocontainers as anticorrosive and self-healing material for steel in strong acid solution.**

Received 00th January 20xx,  
Accepted 00th January 20xx

DOI: 10.1039/x0xx00000x

**M.S. Darris<sup>\*a</sup> S.M.A. Shibli<sup>a,b</sup>**

**Supplementary Information's**

**\*Corresponding author:** E-mail address: [darrisms@gmail.com](mailto:darrisms@gmail.com) (Darris M.S.)

---

<sup>a</sup>Department of Chemistry, University of Kerala, Kariavattom Campus,  
Thiruvananthapuram, Kerala, 695 581, India

---

<sup>b</sup>Centre for Renewable Energy and Materials, University of Kerala, Kariavattom  
Campus, Thiruvananthapuram, Kerala, 695 581, India

Electronic Supplementary Information (ESI) available: [details of any supplementary  
information available should be included here]. See DOI: 10.1039/x0xx00000x

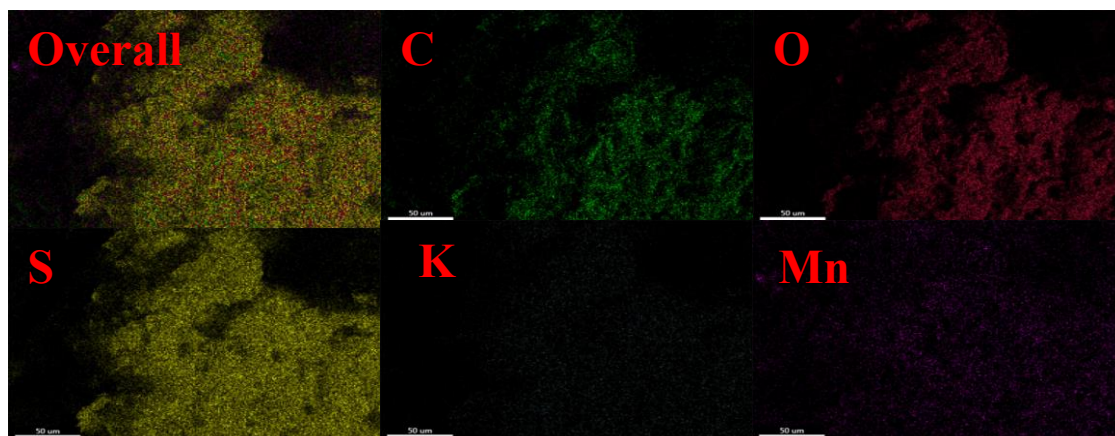

Fig. S1 Elemental mapping for rGO

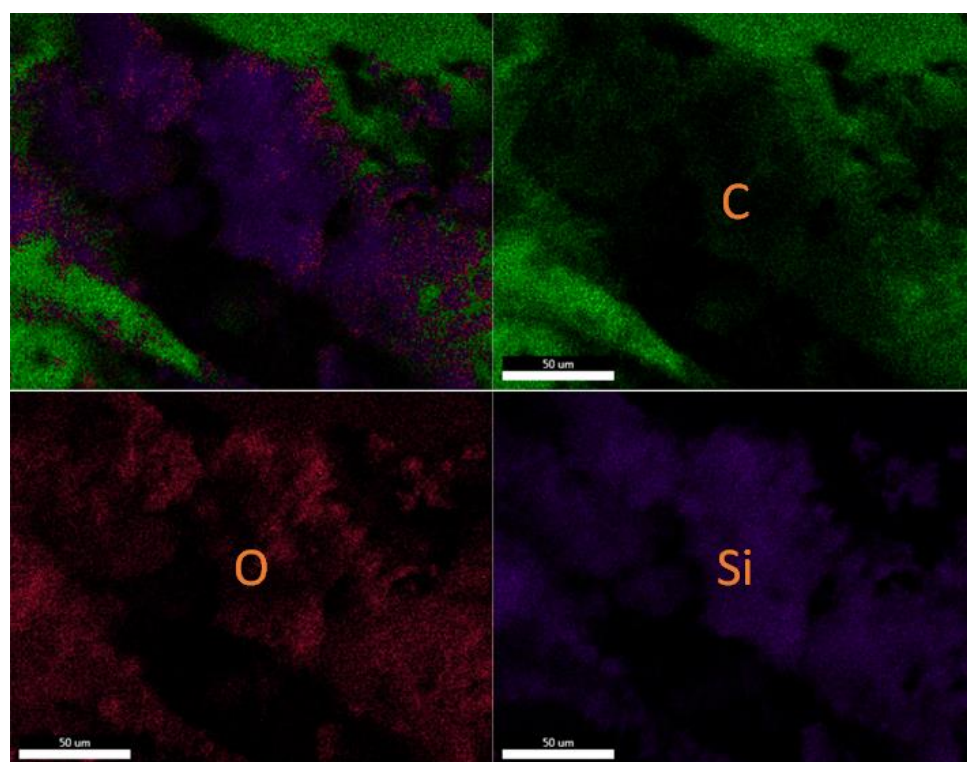

Fig. S2 Elemental mapping for GOS

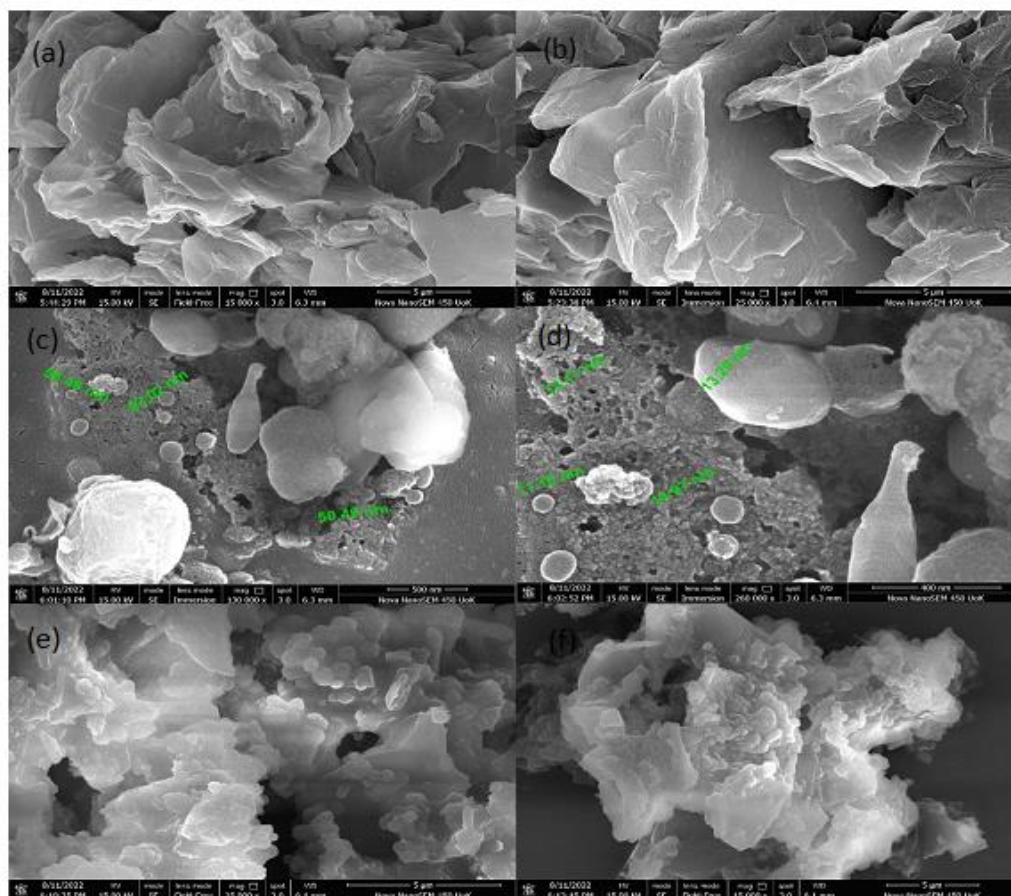

Fig. S3 FESEM images of (a,b) rGO (c,d) GOS (e,f) GSBIM

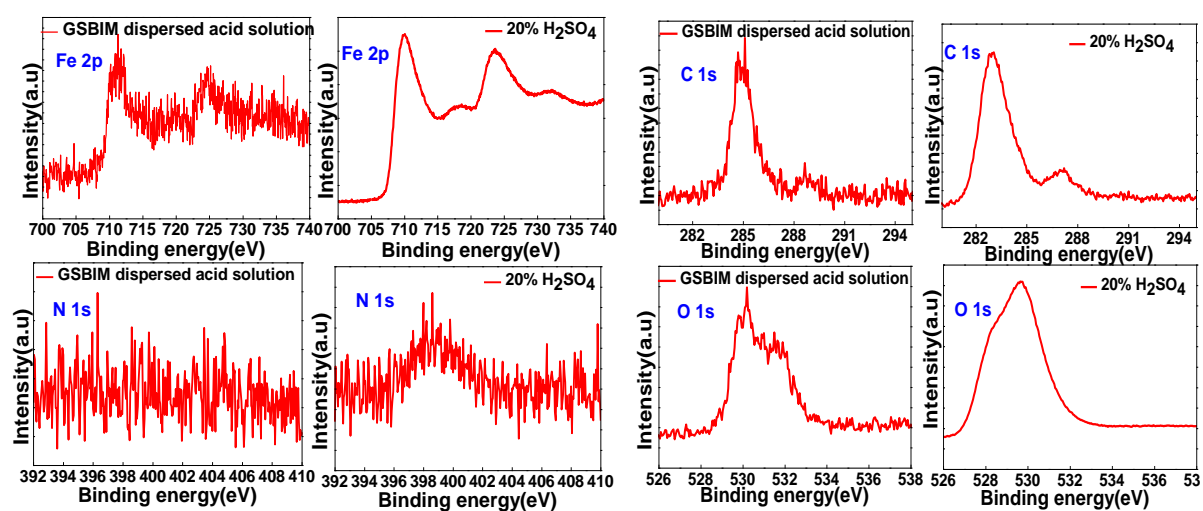

Fig. S4: XPS spectra of mild steel after 72 hours immersion on 20%  $\text{H}_2\text{SO}_4$  and GSBIM dispersed acid solution.

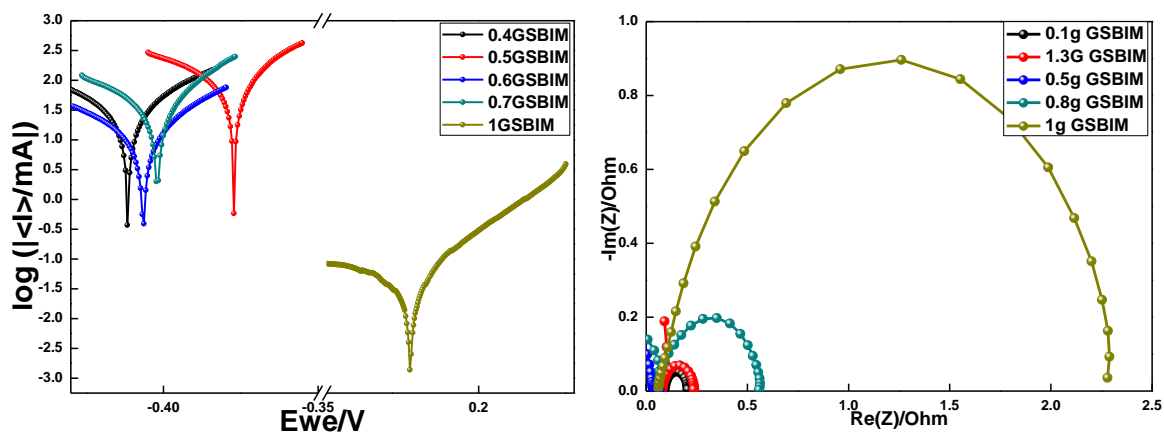

Fig.S5: Tafel plot and EIS spectra of GSBIM at various concentration in 20%  $H_2SO_4$

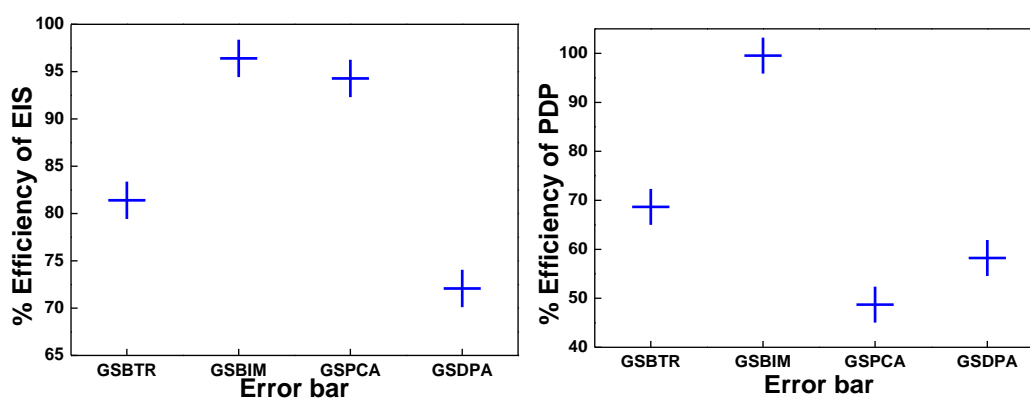

Fig.S6: Error bars indicated for the repeated measurement of Electrochemical Impedance Spectroscopy (EIS) and Potentiodynamic polarization (PDP)

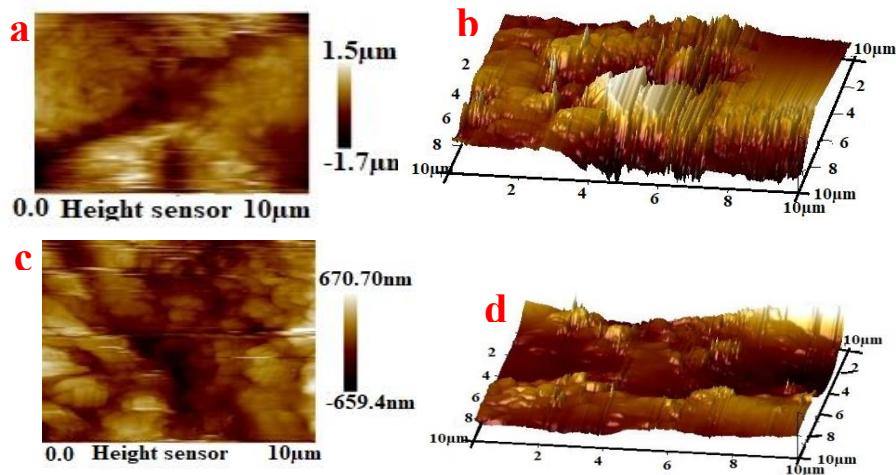

Fig.S7: 2D and 3D AFM images of (a&b) mild steel in acid solution (c&d) mild steel in GOSB dispersed acid solution.

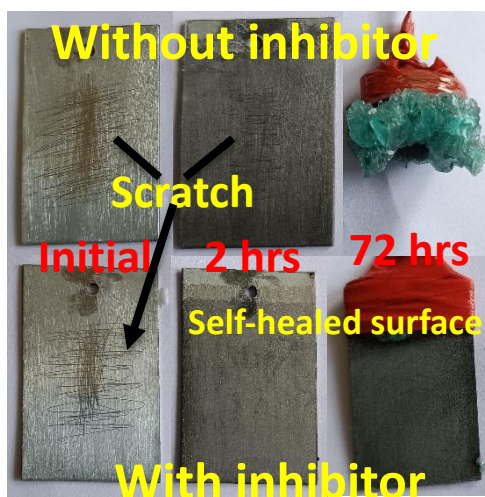

Fig.S8: Scratch test for self-healing

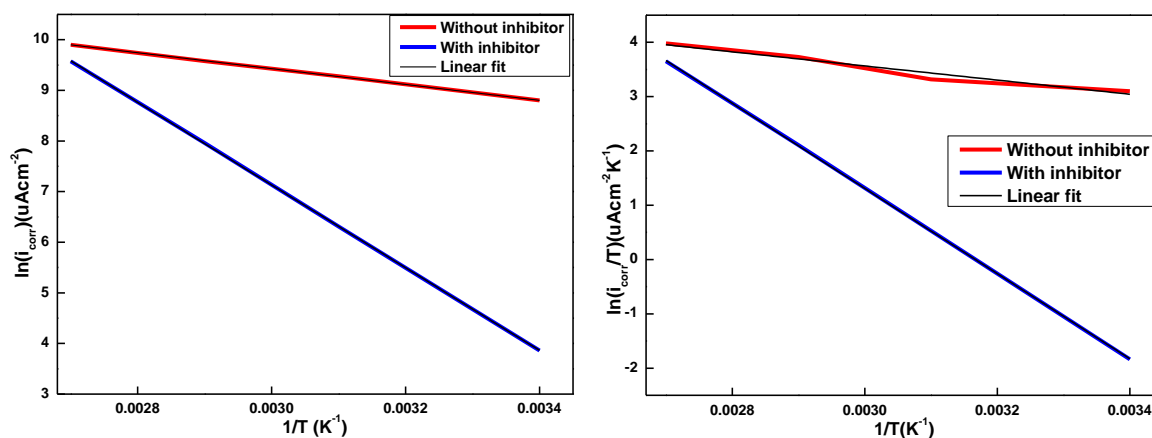Fig.S9: Arrhenius plot and Transition state diagram for mild steel immersed in 20% H<sub>2</sub>SO<sub>4</sub> acid solution.

| Sample | BET Surface area (m <sup>2</sup> /g) | BJH pore volume (cc/g) | BJH average pore diameter (nm) |
|--------|--------------------------------------|------------------------|--------------------------------|
| rGO    | 16.436                               | 0.018                  | 1.984                          |
| GOS    | 22.873                               | 0.034                  | 1.476                          |
| GSBIM  | 5.709                                | 0.008                  | 1.485                          |

Table S1: BET analysis for rGO, GOS and GOSB



| Sl.No.     | Inhibitor                                                                       | Substrate    | Medium                                 | Efficiency    | Reference                       |
|------------|---------------------------------------------------------------------------------|--------------|----------------------------------------|---------------|---------------------------------|
| 1.         | tetrahydroacridines                                                             | Steel        | 15%HCl                                 | 97.87%        | 1                               |
| 2.         | 1,12-bis((1H-benzimidazol-2-thioyl)dodecane                                     | Steel        | 1M HCl                                 | 97%           | 2                               |
| 3.         | N,S dopped Carbon dot                                                           | Steel        | 15%HCl                                 | 98.64%        | 3                               |
| 4.         | (N-(quinolin-8-yl) quinoline-2-carboxamide)                                     | Steel        | 1M HCl                                 | 94.34%        | 4                               |
| 5.         | <u>choline</u> formate Ionic liquid                                             | Steel        | 5%HCl                                  | 96.9%         | 5                               |
| 6.         | diaminododecane functionalized graphene oxide                                   | Steel        | 15%HCl                                 | 84%           | 6                               |
| 7.         | 1-[3-(3-methoxyphenyl)-5-(quinoxalin-6-yl)-4,5-dihydropyrazol-1-yl]propan-1-one | Steel        | 1M HCl                                 | 93.69%        | 7                               |
| 8.         | Naphthalen-2-yl Naphthalene-2-Carboxamide                                       | Steel        | 1M HCl                                 | 98.5%         | 8                               |
| 9.         | Dextran+KI                                                                      | Steel        | 15% H <sub>2</sub> SO <sub>4</sub>     | 99.4%         | 9                               |
| 10.        | <u>chalcone oxime</u> functionalized graphene oxide                             | Steel        | HCl                                    | 94%           | 10                              |
| 11.        | 2-(2-hydroxyphenyl)-benzothiazole                                               | Steel        | 3.38M HCl                              | 90.17%        | 11                              |
| 12.        | 2,3-diphenyl-1,8-naphthyridine carboxyethylthiosuccinic                         | Steel        | 1M HCl                                 | 96.95%        | 12                              |
| <b>13.</b> | <b>Benzimidazole encapsulated silane nano container (GSBIM)</b>                 | <b>steel</b> | <b>20% H<sub>2</sub>SO<sub>4</sub></b> | <b>99.53%</b> | <b>Present inhibitor system</b> |

**Table. S2:** Comparison table of inhibitors in acid medium and their efficiency

## References

- 1 W. Zhang, H. J. Li, M. Wang, L. J. Wang, Q. Pan, X. Ji, Y. Qin and Y. C. Wu, *J. Mol. Liq.*, 2019, **293**, 111478.
- 2 M. Chafiq, A. Chaouiki, M. Damej, H. Lgaz, R. Salghi, I. H. Ali, M. Benmessaoud, S. Masroor and I. M. Chung, *J. Mol. Liq.*, 2020, **309**, 113070.
- 3 V. Saraswat and M. Yadav, *Colloids Surfaces A Physicochem. Eng. Asp.*, 2021, **627**, 127172.
- 4 R. Sadeghi Erami, M. Amirnasr, S. Meghdadi, M. Talebian, H. Farrokhpour and K. Raeissi, *Corros. Sci.*, 2019, **151**, 190–197.
- 5 M. Mobin, R. Aslam, R. Salim and S. Kaya, *J. Colloid Interface Sci.*, 2022, **620**, 293–312.
- 6 T. A. Saleh, K. Haruna and B. Alharbi, *J. Colloid Interface Sci.*, 2023, **630**, 591–610.

- 7 L. O. Olasunkanmi and E. E. Ebenso, *J. Colloid Interface Sci.*, 2020, **561**, 104–116.
- 8 P. Kannan, T. S. Rao and N. Rajendran, *J. Colloid Interface Sci.*, 2018, **512**, 618–628.
- 9 M. M. Solomon, S. A. Umoren, I. B. Obot, A. A. Sorour and H. Gerengi, *ACS Appl. Mater. Interfaces*, 2018, **10**, 28112–28129.
- 10 A. Thoume, D. Benmessaoud Left, A. Elmakssoudi, R. Achagar, M. Dakir, M. Azzi and M. Zertoubi, *Langmuir*, 2022, **38**, 7472–7483.
- 11 M. Afzalkhah, S. Masoum, M. Behpour, H. Naeimi and A. Reisi-Vanani, *Ind. & Eng. Chem. Res.*, 2017, **56**, 9035–9044.
- 12 Y. San, J. Sun, H. Wang, Z.-H. Jin and H.-J. Gao, *ACS Omega*, 2021, **6**, 28063–28071.
